# Supplementary material
Source: publisher site journal article supplement (https://www.spandidos-publications.com/7180/downloadSupplementary)
Supplement: Supplementary file 1 [file downloadSupplementary]

Table SI. Primer sequences.

| Gene    | Primer  | Sequence, 5'→3'           |
|---------|---------|---------------------------|
| VLDLR   | Forward | AGTATGTAACCAGGAGCAGGAC    |
|         | Reverse | CACAGTCACACTCGTAGCCTAT    |
| CD36    | Forward | TCTTTCCTGCAGCCCAATG       |
|         | Reverse | AGCCTCTGTTCCAAC TGATAGTGA |
| FABP3   | Forward | GTGGAGTTCGATGAGACAACAGC   |
|         | Reverse | TGGTCTCTTGCCCGTCCCATT     |
| FABP7   | Forward | CTGTTGTTAGCCTGGATGGAGAC   |
|         | Reverse | CTCATAGTGGCGAACAGCAACC    |
| PLIN2   | Forward | TTGCAGTTGCCAATACCTATGC    |
|         | Reverse | CCAGTCACAGTAGTCGTCA       |
| HILPDA  | Forward | CCGACTTTCCTCCGGACT        |
|         | Reverse | CCTTCTGAAAGGCCTCTGG       |
| PNPLA2  | Forward | ATGGTGGCATT CAGACAACC     |
|         | Reverse | CGGACAGATGTCACTCTCGC      |
| LPIN1   | Forward | TTTCCACGTCCGCTTTGGG       |
|         | Reverse | GTGGCCAGGTGCATAGGG        |
| DGAT1   | Forward | TATTGCGGCCAATGTCTTTGC     |
|         | Reverse | CACTGGAGTGATAGACTCAACCA   |
| SREBF1  | Forward | ACTTCTGGAGGCATCGCAAGCA    |
|         | Reverse | AGGTTC CAGAGGAGGCTACAAG   |
| FASN    | Forward | AAGGACCTGTCTAGGTTTGATGC   |
|         | Reverse | TGGCTTCATAGGTGACTTCCA     |
| β-actin | Forward | TGGCACCCAGCACAATGAA       |
|         | Reverse | CTAAGTCATAGTCCGCCTAGAAGCA |

VLDLR, very low-density lipoprotein receptor; FABP, fatty acid binding protein; PLIN2, perilipin 2; HILPDA, hypoxia inducible lipid droplet associated; PNPLA2, patatin like phospholipase domain containing 2; LPIN1, lipin 1; DGAT1, diacylglycerol O-acyltransferase 1; SREBF1, sterol regulatory element-binding factor 1; FASN, fatty acid synthase.
